# Supplementary material for: Blood donor variability is a modulatory factor for P. falciparum invasion phenotyping assays
Source: PubMed Central journal article supplement (PMC8007732; doi:10.1038/s41598-021-86438-1), 2021-03-29
Supplement: 41598_2021_86438_MOESM1_ESM.pdf [file 41598_2021_86438_MOESM1_ESM.pdf]

## **Blood donor variability is a modulatory factor for *P. falciparum* invasion phenotyping assays**

Laty G. Thiam<sup>1,2,\*</sup>, Prince B. Nyarko<sup>1,2,β</sup>, Kwadwo A. Kusi<sup>1,3</sup>, Makhtar Niang<sup>4</sup>, Yaw Aniweh<sup>1,2#</sup> and Gordon A. Awandare<sup>1,2#</sup>

<sup>1</sup>West African Centre for Cell Biology of Infectious Pathogens, College of Basic and Applied Sciences, University of Ghana, Legon

<sup>2</sup>Department of Biochemistry Cell and Molecular Biology, College of Basic and Applied Sciences, University of Ghana, Legon

<sup>3</sup>Department of Immunology, Noguchi Memorial Institute for Medical Research, University of Ghana, Legon

<sup>4</sup>Pôle Immunophysiopathologie et Maladies Infectieuses, Institut Pasteur de Dakar, Senegal

Running Head: Blood donor variability in *P. falciparum* invasion assays

#Address correspondence to Yaw Aniweh, [yaniweh@ug.edu.gh](mailto:yaniweh@ug.edu.gh)

#Address correspondence to Gordon A. Awandare, [gawandare@ug.edu.gh](mailto:gawandare@ug.edu.gh)

\*Present address: G4 MEGA Vaccines, Institut Pasteur de Dakar, Senegal

βPresent address: Laboratory of Pathogen-Host Interaction, UMR5235, CNRS, University of Montpellier

**Table S1:** Clinical and hematological indices of study participants

| ID             | Gender | Blood group | Sickling | Hb genotype | G6PD        | WBC (10 <sup>9</sup> /L) | RBC (10 <sup>12</sup> /L) | HGB (g/dL) | HCT (%) | MCV (fL) | MCH (pg) | MCHC (g/dL) | PLT (10 <sup>9</sup> /L) |
|----------------|--------|-------------|----------|-------------|-------------|--------------------------|---------------------------|------------|---------|----------|----------|-------------|--------------------------|
| <b>GH000**</b> | M      | O+          | -        | AA          | Normal      | 4.34                     | 5.16                      | 13.0       | 42.8    | 83.0     | 25.2     | 30.4        | 153                      |
| <b>GH001</b>   | F      | O+          | -        | AA          | Normal      | 7.98                     | 3.93                      | 11.5       | 38.9    | 98.9     | 29.3     | 29.6        | 342                      |
| <b>GH002</b>   | M      | B+          | -        | AA          | Normal      | 5.91                     | 6.04                      | 15.0       | 51.5    | 85.2     | 24.8     | 29.1        | 231                      |
| <b>GH003</b>   | M      | B+          | +        | AS          | Normal      | 3.16                     | 5.34                      | 15.1       | 46.7    | 87.4     | 28.3     | 32.3        | 220                      |
| <b>GH004</b>   | M      | O+          | +        | AS          | Normal      | 4.38                     | 6.26                      | 13.7       | 44.8    | 71.5     | 21.9     | 30.6        | 218                      |
| <b>GH005</b>   | M      | O+          | -        | AA          | Normal      | 6.82                     | 5.31                      | 14.3       | 47.1    | 88.7     | 26.9     | 30.4        | 202                      |
| <b>GH006</b>   | F      | A+          | -        | AA          | Normal      | 6.88                     | 3.83                      | 12.3       | 39.4    | 102.8    | 32.1     | 31.2        | 273                      |
| <b>GH007</b>   | M      | O-          | -        | AA          | Normal      | 5,07                     | 4,77                      | 14,5       | 43,6    | 91,4     | 30,4     | 33,3        | 228                      |
| <b>GH008</b>   | M      | A+          | -        | AA          | NA          | NA                       | NA                        | NA         | NA      | NA       | NA       | NA          | NA                       |
| <b>GH009</b>   | M      | O+          | -        | AA          | Normal      | 5,59                     | 3,76                      | 13,3       | 39,9    | 106,2    | 35,4     | 33,3        | 317                      |
| <b>GH010</b>   | M      | A+          | +        | AS          | Normal      | 5.57                     | 6.30                      | 16.3       | 51.7    | 82.0     | 25.9     | 31.5        | 258                      |
| <b>GH011</b>   | M      | O+          | -        | AA          | Normal      | 3.86                     | 5.21                      | 15.4       | 48.3    | 92.7     | 29.6     | 31.9        | 169                      |
| <b>GH012</b>   | M      | O+          | -        | AA          | Normal      | 4.74                     | 5.94                      | 15.2       | 49.5    | 83.4     | 25.6     | 30.7        | 197                      |
| <b>GH013</b>   | F      | B+          | -        | AA          | Normal      | 5.53                     | 4.57                      | 13.5       | 43.0    | 94.0     | 29.5     | 31.4        | 244                      |
| <b>GH014</b>   | F      | B+          | +        | AS          | Normal      | 5.73                     | 4.61                      | 12.9       | 40.2    | 87.1     | 28.0     | 32.1        | 251                      |
| <b>GH015</b>   | M      | O+          | -        | AA          | Normal      | 7.90                     | 4.95                      | 14.6       | 46.8    | 94.6     | 29.5     | 31.2        | 253                      |
| <b>GH016</b>   | M      | A+          | -        | AC          | Normal      | 5.49                     | 4.74                      | 13.2       | 39.6    | 83.5     | 27.8     | 33.3        | 244                      |
| <b>GH017</b>   | M      | A+          | -        | AA          | Full Defect | 3,02                     | 3,85                      | 9,9        | 31,5    | 81,8     | 25,7     | 31,4        | 209                      |
| <b>GH018</b>   | F      | O+          | NA       | NA          | NA          | NA                       | NA                        | NA         | NA      | NA       | NA       | NA          | NA                       |
| <b>GH019</b>   | M      | O+          | -        | AC          | Normal      | 7.70                     | 5.48                      | 14.6       | 45.2    | 82.5     | 26.6     | 32.3        | 260                      |
| <b>GH020</b>   | M      | O+          | -        | AA          | Normal      | 5.94                     | 5.35                      | 15.7       | 49.1    | 91.8     | 29.3     | 32.0        | 187                      |

\*\* Erythrocytes from this donor were used for routine parasite culturing and for data normalization

**Table S2:** Summary outputs from multilinear regression analysis showing the relationship between invasion efficiency into untreated erythrocytes and blood group, Hb genotype o receptor density. The data were computed using least square regression method to predict the variation of the invasion rate relative to the independent variables.

**UT\_3D7:** R2 = 0.49, Adjusted R2 = 0.20, F (7, 12) = 1.67, P value = 0.21

| Variable           | Estimate ( $\beta$ ) | Standard error | 95% confidence interval | t      | P value |
|--------------------|----------------------|----------------|-------------------------|--------|---------|
| <b>Blood group</b> | -0,05132             | 0,1171         | -0,3064 - 0,2038        | 0,4383 | 0,6689  |
| <b>Hb Genotype</b> | -0,2661              | 0,2345         | -0,7771 - 0,2449        | 1,135  | 0,2787  |
| <b>GYPAB</b>       | -1,721e-005          | 6,056e-005     | -0,0001492 - 0,0001147  | 0,2841 | 0,7812  |
| <b>GYP A</b>       | -0,0004831           | 0,0003743      | -0,001299 - 0,0003324   | 1,291  | 0,2211  |
| <b>GYP C</b>       | -0,0002623           | 0,0004069      | -0,001149 - 0,0006241   | 0,6448 | 0,5312  |
| <b>CR1</b>         | 0,001089             | 0,0005766      | -0,0001668 - 0,002346   | 1,889  | 0,0832  |
| <b>DAF</b>         | 0,001071             | 0,001679       | -0,002587 - 0,004728    | 0,6378 | 0,5356  |

**UT\_Dd2:** R2 = 0.33, Adjusted R2 = -0.67, F (7, 12) = 0.8291, P value = 0.58

| Variable           | Estimate ( $\beta$ ) | Standard error | 95% confidence interval | t      | P value |
|--------------------|----------------------|----------------|-------------------------|--------|---------|
| <b>Blood group</b> | 0.05958              | 0.09235        | -0.1416 - 0.2608        | 0.6451 | 0.5310  |
| <b>Hb Genotype</b> | -0.1441              | 0.1850         | -0.5472 - 0.2590        | 0.7787 | 0.4512  |
| <b>GYPAB</b>       | -1.736e-005          | 4.777e-005     | -0.0001214 - 8.673e-005 | 0.3634 | 0.7226  |
| <b>GYP A</b>       | 0.0001856            | 0.0002952      | -0.0004577 - 0.0008288  | 0.6286 | 0.5414  |
| <b>GYP C</b>       | -0.0006127           | 0.0003209      | -0.001312 - 8.660e-005  | 1.909  | 0.0805  |
| <b>CR1</b>         | 0.0003809            | 0.0004548      | -0.0006101 - 0.001372   | 0.8374 | 0.4187  |
| <b>DAF</b>         | -0.001004            | 0.001324       | -0.003890 - 0.001881    | 0.7585 | 0.4628  |

**UT\_W2mef:** R2 = 0.45, Adjusted R2 = 1.13, F (7, 12) = 1.392, P value = 0.29

| Variable           | Estimate ( $\beta$ ) | Standard error | 95% confidence interval | t      | P value |
|--------------------|----------------------|----------------|-------------------------|--------|---------|
| <b>Blood group</b> | 0,04067              | 0,07859        | -0,1306 - 0,2119        | 0,5175 | 0,6142  |
| <b>Hb Genotype</b> | -0,1877              | 0,1575         | -0,5308 - 0,1553        | 1,192  | 0,2562  |
| <b>GYPAB</b>       | -2,169e-005          | 4,066e-005     | -0,0001103 - 6,689e-005 | 0,5335 | 0,6035  |
| <b>GYP A</b>       | 5,069e-005           | 0,0002513      | -0,0004967 - 0,0005981  | 0,2018 | 0,8435  |
| <b>GYP C</b>       | -4,383e-005          | 0,0002731      | -0,0006389 - 0,0005513  | 0,1605 | 0,8752  |
| <b>CR1</b>         | 0,0008825            | 0,0003871      | 3,914e-005 - 0,001726   | 2,280  | 0,0417  |
| <b>DAF</b>         | -0,0003185           | 0,001127       | -0,002774 - 0,002137    | 0,2826 | 0,7823  |

**UT\_MISA010:** R2 = 0.2, Adjusted R2 = 0.04, F (7, 12) = 1.127, P value = 0.41

| Variable    | Estimate ( $\beta$ ) | Standard error | 95% confidence interval | t      | P value |
|-------------|----------------------|----------------|-------------------------|--------|---------|
| Blood group | -0,04625             | 0,1176         | -0,3025 - 0,2100        | 0,3932 | 0,7010  |
| Hb Genotype | -0,2919              | 0,2356         | -0,8053 - 0,2215        | 1,239  | 0,2392  |
| GYPAB       | 7,748e-006           | 6,084e-005     | -0,0001248 - 0,0001403  | 0,1273 | 0,9008  |
| GYPA        | -0,0003037           | 0,0003760      | -0,001123 - 0,0005155   | 0,8078 | 0,4350  |
| GYPC        | -0,0003782           | 0,0004088      | -0,001269 - 0,0005125   | 0,9251 | 0,3731  |
| CR1         | 0,0004047            | 0,0005793      | -0,0008574 - 0,001667   | 0,6987 | 0,4981  |
| DAF         | -0,001651            | 0,001687       | -0,005326 - 0,002024    | 0,9790 | 0,3469  |

**UT\_MISA011:** R2 = 0.65, Adjusted R2 = 0.45, F (7, 12) = 3.186, P value = 0.04

| Variable    | Estimate ( $\beta$ ) | Standard error | 95% confidence interval  | t       | P value |
|-------------|----------------------|----------------|--------------------------|---------|---------|
| Blood group | -0,04720             | 0,08016        | -0,2218 - 0,1275         | 0,5888  | 0,5669  |
| Hb Genotype | -0,03375             | 0,1606         | -0,3836 - 0,3161         | 0,2101  | 0,8371  |
| GYPAB       | -0,0001302           | 4,147e-005     | -0,0002206 - -3,989e-005 | 3,141   | 0,0085  |
| GYPA        | 0,0003764            | 0,0002562      | -0,0001819 - 0,0009347   | 1,469   | 0,1676  |
| GYPC        | 6,202e-005           | 0,0002786      | -0,0005449 - 0,0006690   | 0,2226  | 0,8276  |
| CR1         | 0,0007183            | 0,0003948      | -0,0001418 - 0,001578    | 1,820   | 0,0939  |
| DAF         | -2,505e-005          | 0,001149       | -0,002529 - 0,002479     | 0,02180 | 0,9830  |

**UT\_MISA018:** R2 = 0.43, Adjusted R2 = 0.09, F (7, 12) = 1.290, P value = 0.33

| Variable    | Estimate   | Standard error | 95% confidence interval | t      | P value |
|-------------|------------|----------------|-------------------------|--------|---------|
| Blood group | -0,06779   | 0,1246         | -0,3392 - 0,2036        | 0,4079 | 0,6905  |
| Hb Genotype | 0,1987     | 0,2495         | -0,3450 - 0,7424        | 0,5442 | 0,5963  |
| GYPAB       | -0,0001291 | 6,443e-005     | -0,0002695 - 1,133e-005 | 0,7961 | 0,4414  |
| GYPA        | 0,0006449  | 0,0003982      | -0,0002227 - 0,001513   | 2,003  | 0,0683  |
| GYPC        | 0,0004201  | 0,0004329      | -0,0005231 - 0,001363   | 1,620  | 0,1313  |
| CR1         | 0,0007125  | 0,0006134      | -0,0006240 - 0,002049   | 0,9704 | 0,3510  |
| DAF         | -0,0001109 | 0,001786       | -0,004002 - 0,003781    | 1,162  | 0,2680  |

**Table S3-S8:** Summary of invasion profiles of individual *P. falciparum* strains into enzyme-treated erythrocyte from different donors.

Data represent mean values  $\pm$  the standard deviation from two independent experiments conducted in triplicates. A cut-off of 50% was taken as a threshold to classify the observed profile as sensitive ( $\leq 50\%$ ) or resistance ( $> 50\%$ ) for each given treatment.

**Table S3: MISA010**

| Donor Erythrocyte | Gender | % invasion relative to untreated control |                           |                   |                       |
|-------------------|--------|------------------------------------------|---------------------------|-------------------|-----------------------|
|                   |        | Invasion profile                         | Neuraminidase (250 mU/ml) | Trypsin (1mg/ml)  | Chymotrypsin (1mg/ml) |
| O+/AA             | F      | NrTsCr                                   | 103.1 $\pm$ 16.3          | 41.7 $\pm$ 4.1    | 60.4 $\pm$ 17.0       |
| B+/AA             | M      | NrTsCr                                   | 75.0 $\pm$ 8.1            | 25.0 $\pm$ 7.0    | 61.3 $\pm$ 11.2       |
| B+/AS             | M      | NrTsCs                                   | 119.6 $\pm$ 22.4          | 28.6 $\pm$ 4.2    | 42.9 $\pm$ 8.6        |
| O+/AS             | M      | NrTsCs                                   | 62.5 $\pm$ 6.1            | 35.4 $\pm$ 15.6   | 35.4 $\pm$ 18.9       |
| O+/AA             | M      | NrTsCr                                   | 75.7 $\pm$ 23.3           | 23.6 $\pm$ 4.3    | 51.7 $\pm$ 19.5       |
| A+/AA             | F      | NrTrCr                                   | 71.43 $\pm$ 18.31         | 85.71 $\pm$ 1,23  | 57.14 $\pm$ 17.73     |
| O-/AA             | M      | NrTsCs                                   | 75.22 $\pm$ 9.87          | 44.95 $\pm$ 1.47  | 45.45 $\pm$ 12.55     |
| A+/AA             | M      | NrTrCs                                   | 66.66 $\pm$ 17.36         | 55.55 $\pm$ 4.78  | 46.29 $\pm$ 4,78      |
| O+/AA             | M      | NrTrCr                                   | 80.55 $\pm$ 13.58         | 58.33 $\pm$ 29.48 | 65.74 $\pm$ 14.3      |
| A+/AS             | M      | NrTrCr                                   | 81.31 $\pm$ 5.62          | 52.52 $\pm$ 16.52 | 57.57 $\pm$ 16.26     |
| O+/AA             | M      | NrTrCr                                   | 81.62 $\pm$ 5,87          | 72.46 $\pm$ 14.54 | 51.0 $\pm$ 5.85       |
| O+/AA             | M      | NrTrCs                                   | 75.12 $\pm$ 2.17          | 71.52 $\pm$ 13.18 | 40.59 $\pm$ 7.25      |
| B+/AA             | M      | NrTsCr                                   | 54.35 $\pm$ 4.24          | 47.06 $\pm$ 8.5   | 67.64 $\pm$ 7.15      |
| B+/AS             | F      | NrTsCs                                   | 60.71 $\pm$ 0.92          | 25 $\pm$ 13.04    | 41.67 $\pm$ 16.34     |
| O+/AA             | M      | NrTsCs                                   | 71.23 $\pm$ 21.05         | 32 $\pm$ 15.31    | 36 $\pm$ 7.37         |
| A+/AC             | M      | NrTsCr                                   | 83.33 $\pm$ 11.72         | 41.67 $\pm$ 13.44 | 50.42 $\pm$ 13.1      |
| A+/AA             | M      | NrTrCr                                   | 83.33 $\pm$ 14.91         | 50.34 $\pm$ 19.72 | 52.5 $\pm$ 5.1        |
| O+/AA             | F      | NrTrCs                                   | 85.36 $\pm$ 16.71         | 65.13 $\pm$ 12.19 | 45.65 $\pm$ 5.59      |
| O+/AC             | M      | NrTsCs                                   | 79.48 $\pm$ 11.14         | 35.90 $\pm$ 14.56 | 21.88 $\pm$ 9.97      |
| O+/AA             | M      | NrTsCs                                   | 63.49 $\pm$ 15.69         | 22.22 $\pm$ 0.65  | 34.75 $\pm$ 7.70      |

**Table S4: MISA011**

| <b>Donor erythrocytes</b> | <b>Gender</b> | <b>% invasion relative to untreated control</b> |                                  |                         |                              |
|---------------------------|---------------|-------------------------------------------------|----------------------------------|-------------------------|------------------------------|
|                           |               | <b>Invasion profile</b>                         | <b>Neuraminidase (250 mU/ml)</b> | <b>Trypsin (1mg/ml)</b> | <b>Chymotrypsin (1mg/ml)</b> |
| <b>O+/AA</b>              | F             | NrTsCr                                          | 115.89 ± 2.33                    | 42.39 ± 10.26           | 56.75 ± 26.27                |
| <b>B+/AA</b>              | M             | NrTsCr                                          | 103.03 ± 8.11                    | 25.06 ± 9.42            | 50.35 ± 6.36                 |
| <b>B+AS</b>               | M             | NrTsCs                                          | 110.71 ± 24.1                    | 35.71 ± 19.19           | 46.43 ± 17.56                |
| <b>O+AS</b>               | M             | NrTsCs                                          | 105.14 ± 8.52                    | 30.28 ± 8.39            | 40 ± 14.97                   |
| <b>O+AA</b>               | M             | NrTsCs                                          | 101.96 ± 18.13                   | 33.44 ± 5.92            | 35.89 ± 9.95                 |
| <b>A+/AA</b>              | F             | NrTrCs                                          | 99.06 ± 14.35                    | 55.14 ± 15.69           | 46.48 ± 7.23                 |
| <b>O-/AA</b>              | M             | NrTsCs                                          | 83.89 ± 14.81                    | 30.09 ± 11.83           | 32.2 ± 13.89                 |
| <b>A+/AA</b>              | M             | NrTsCs                                          | 72.55 ± 11.24                    | 32.84 ± 8.9             | 42.53 ± 6.85                 |
| <b>O+/AA</b>              | M             | NrTsCs                                          | 105.60 ± 9.64                    | 37.58 ± 9.36            | 37.36 ± 9.78                 |
| <b>A+/AS</b>              | M             | NrTsCs                                          | 88.04 ± 10.32                    | 36.14 ± 21.78           | 31.26 ± 11.93                |
| <b>O+/AA</b>              | M             | NrTsCs                                          | 59.76 ± 6.28                     | 23.15 ± 6.24            | 29.67 ± 5.31                 |
| <b>O+/AA</b>              | M             | NrTsCs                                          | 71.73 ± 9.29                     | 33.30 ± 11.85           | 43.01 ± 16.62                |
| <b>B+/AA</b>              | M             | NrTrCs                                          | 81.81 ± 3.84                     | 50.65 ± 9.00            | 79.11 ± 7.65                 |
| <b>B+/AS</b>              | F             | NrTsCs                                          | 60.53 ± 3.84                     | 26.29 ± 9.55            | 36.45 ± 13.45                |
| <b>O+/AA</b>              | M             | NrTrCs                                          | 91.38 ± 16.01                    | 29.79 ± 14.67           | 37.70 ± 11.05                |
| <b>A+/AC</b>              | M             | NrTsCs                                          | 72.56 ± 3.98                     | 20.76 ± 2.02            | 28.31 ± 1.70                 |
| <b>A+/AA</b>              | M             | NrTsCs                                          | 82.31 ± 7.00                     | 19.72 ± 3.85            | 32.60 ± 4.98                 |
| <b>O+/AA</b>              | F             | NrTrCs                                          | 83.20 ± 13.44                    | 72.56 ± 7.87            | 26.05 ± 2.31                 |
| <b>O+/AC</b>              | M             | NrTsCs                                          | 113.26 ± 12.97                   | 32.33 ± 19.87           | 27.45 ± 12.71                |
| <b>O+/AA</b>              | M             | NrTsCs                                          | 66.80 ± 3.25                     | 23.33 ± 7.43            | 34.31 ± 11.03                |

**Table S5: MISA018**

| <b>% invasion relative to untreated control</b> |               |                         |                                  |                         |                              |
|-------------------------------------------------|---------------|-------------------------|----------------------------------|-------------------------|------------------------------|
| <b>Donor Erythrocyte</b>                        | <b>Gender</b> | <b>Invasion profile</b> | <b>Neuraminidase (250 mU/ml)</b> | <b>Trypsin (1mg/ml)</b> | <b>Chymotrypsin (1mg/ml)</b> |
| <b>O+/AA</b>                                    | F             | NrTsCr                  | 90.48 ± 7.84                     | 38.28 ± 5.14            | 44.8 ± 5.13                  |
| <b>B+/AA</b>                                    | M             | NrTsCr                  | 87.47 ± 11.81                    | 27.58 ± 12.07           | 38.24 ± 12.42                |
| <b>B+AS</b>                                     | M             | NrTsCs                  | 99.08 ± 6.46                     | 34.31 ± 14.28           | 43.72 ± 11.36                |
| <b>O+AS</b>                                     | M             | NrTsCs                  | 78.91 ± 4.89                     | 33.15 ± 13.31           | 35.51 ± 6.58                 |
| <b>O+AA</b>                                     | M             | NrTsCr                  | 92.89 ± 4.59                     | 27.46 ± 6.22            | 35,45 ± 5.68                 |
| <b>A+/AA</b>                                    | F             | NrTrCr                  | 75.59 ± 4.59                     | 66.67 ± 7.07            | 65.38 ± 16.79                |
| <b>O-/AA</b>                                    | M             | NrTsCs                  | 63.09 ± 11.75                    | 36.36 ± 8.76            | 45.80 ± 9.87                 |
| <b>A+/AA</b>                                    | M             | NrTrCr                  | 71.21 ± 18.51                    | 53.98 ± 16.55           | 55.21 ± 9.61                 |
| <b>O+/AA</b>                                    | M             | NrTrCr                  | 116.98 ± 24.10                   | 75.26 ± 30.78           | 66.67 ± 9,24                 |
| <b>A+/AS</b>                                    | M             | NrTrCr                  | 81.34 ± 25.29                    | 52.76 ± 26.97           | 58.5 ± 13.99                 |
| <b>O+/AA</b>                                    | M             | NrTsCs                  | 64.61 ± 7.60                     | 46.15 ± 2.65            | 43.25 ± 10.92                |
| <b>O+/AA</b>                                    | M             | NrTrCr                  | 84.31 ± 14.20                    | 50.15 ± 15.49           | 60.74 ± 8.94                 |
| <b>B+/AA</b>                                    | M             | NrTrCs                  | 85.71 ± 12.65                    | 57.14 ± 4.92            | 42.86 ± 5,53                 |
| <b>B+/AS</b>                                    | F             | NrTsCr                  | 52.57 ± 10.63                    | 21.2 ± 2.99             | 54.55 ± 12.96                |
| <b>O+/AA</b>                                    | M             | NrTsCr                  | 68.36 ± 27.85                    | 34.48 ± 8,51            | 62.07 ± 16.79                |
| <b>A+/AC</b>                                    | M             | NrTsCs                  | 54.54 ± 5,63                     | 20.09 ± 4,30            | 36.36 ± 14.76                |
| <b>A+/AA</b>                                    | M             | NrTsCr                  | 85.71 ± 2.95                     | 45.71 ± 6.76            | 71.42 ± 17.21                |
| <b>O+/AA</b>                                    | F             | NrTrCs                  | 62.50 ± 15.86                    | 50.36 ± 16.45           | 40.93 ± 23.05                |
| <b>O+/AC</b>                                    | M             | NrTsCs                  | 73.85 ± 10.27                    | 32.31 ± 11.19           | 23.08 ± 7.96                 |
| <b>O+/AA</b>                                    | M             | NrTsCs                  | 60.29 ± 5.31                     | 27.94 ± 9.33            | 37.65 ± 10.11                |

**Table S6: 3D7**

| <b>% invasion relative to untreated control</b> |               |                         |                                  |                         |                              |
|-------------------------------------------------|---------------|-------------------------|----------------------------------|-------------------------|------------------------------|
| <b>Donor Erythrocyte</b>                        | <b>Gender</b> | <b>Invasion profile</b> | <b>Neuraminidase (250 mU/ml)</b> | <b>Trypsin (1mg/ml)</b> | <b>Chymotrypsin (1mg/ml)</b> |
| <b>O+/AA</b>                                    | F             | NrTsCs                  | 86.54 ± 9.82                     | 43.76 ± 11.41           | 49.9 ± 7.22                  |
| <b>B+/AA</b>                                    | M             | NrTsCs                  | 79.24 ± 16.54                    | 30.05 ± 9.74            | 44.26 ± 4.43                 |
| <b>B+AS</b>                                     | M             | NrTsCs                  | 86.36 ± 11.64                    | 31.76 ± 8.91            | 48.37 ± 7.05                 |
| <b>O+AS</b>                                     | M             | NrTsCs                  | 88.02 ± 15.45                    | 30.57 ± 2.00            | 47.19 ± 4.61                 |
| <b>O+AA</b>                                     | M             | NrTsCs                  | 88.07 ± 14.44                    | 23.25 ± 11.51           | 48.70 ± 7.05                 |
| <b>A+/AA</b>                                    | F             | NrTsCs                  | 86.93 ± 8.26                     | 48.52 ± 7.97            | 45 ± 8.21                    |
| <b>O-/AA</b>                                    | M             | NrTsCs                  | 81.39 ± 8.92                     | 35 ± 8.21               | 44.44 ± 6.34                 |
| <b>A+/AA</b>                                    | M             | NrTsCs                  | 69.98 ± 6.48                     | 40.98 ± 5.75            | 43.06 ± 3.06                 |
| <b>O+/AA</b>                                    | M             | NrTsCs                  | 78.67 ± 6.69                     | 34.17 ± 6.44            | 36.61 ± 7.87                 |
| <b>A+/AS</b>                                    | M             | NrTsCs                  | 62.36 ± 9.78                     | 30.00 ± 6.27            | 31.37 ± 5.95                 |
| <b>O+/AA</b>                                    | M             | NrTsCr                  | 68.61 ± 8.55                     | 28.72 ± 9.3             | 59.18 ± 7.89                 |
| <b>O+/AA</b>                                    | M             | NrTsCr                  | 74.68 ± 9.55                     | 33.03 ± 6.81            | 58.81 ± 6.34                 |
| <b>B+/AA</b>                                    | M             | NrTsCs                  | 63.43 ± 43                       | 32.37 ± 6.19            | 45.09 ± 8.43                 |
| <b>B+/AS</b>                                    | F             | NrTsCr                  | 67.57 ± 10.84                    | 28.14 ± 21.94           | 57.95 ± 18.05                |
| <b>O+/AA</b>                                    | M             | NrTsCr                  | 82.13 ± 11.59                    | 27.8 ± 9.09             | 54.52 ± 13.83                |
| <b>A+/AC</b>                                    | M             | NrTsCs                  | 68.17 ± 3.87                     | 24.18 ± 2.97            | 24.01 ± 2.04                 |
| <b>A+/AA</b>                                    | M             | NrTsCs                  | 100 ± 6.70                       | 26.31 ± 0.39            | 25.66 ± 4.72                 |
| <b>O+/AA</b>                                    | F             | NrTsCs                  | 69.89 ± 10.98                    | 76 ± 15.4               | 24.1 ± 1.04                  |
| <b>O+/AC</b>                                    | M             | NrTsCs                  | 99.23 ± 3.79                     | 36.71 ± 4.09            | 14.68 ± 7.78                 |
| <b>O+/AA</b>                                    | M             | NrTsCs                  | 51.87 ± 14.31                    | 7.67 ± 3.21             | 30.70 ± 2.69                 |



**Table S7: Dd2**

| <b>% invasion relative to untreated control</b> |               |                         |                                  |                         |                              |
|-------------------------------------------------|---------------|-------------------------|----------------------------------|-------------------------|------------------------------|
| <b>Donor Erythrocyte</b>                        | <b>Gender</b> | <b>Invasion profile</b> | <b>Neuraminidase (250 mU/ml)</b> | <b>Trypsin (1mg/ml)</b> | <b>Chymotrypsin (1mg/ml)</b> |
| <b>O+/AA</b>                                    | F             | NsTsCs                  | 30.94 ± 4.34                     | 32.25 ± 1.85            | 37.87 ± 4.47                 |
| <b>B+/AA</b>                                    | M             | NsTsCr                  | 31.03 ± 3.08                     | 37.93 ± 16.82           | 51.72 ± 2.05                 |
| <b>B+AS</b>                                     | M             | NsTsCr                  | 36.71 ± 13.75                    | 44.05 ± 5.69            | 51.39 ± 2.05                 |
| <b>O+AS</b>                                     | M             | NsTsCr                  | 31.03 ± 3.08                     | 37.93 ± 6.04            | 51.72 ± 2.05                 |
| <b>O+AA</b>                                     | M             | NsTsCr                  | 36.71 ± 5.76                     | 44.05 ± 5.69            | 51.4 ± 6.69                  |
| <b>A+/AA</b>                                    | F             | NsTsCs                  | 23.08 ± 6.89                     | 30.77 ± 6.95            | 38.46 ± 7.94                 |
| <b>O-/AA</b>                                    | M             | NsTsCr                  | 27.27 ± 11,56                    | 36.06 ± 8.21            | 54.26 ± 4.69                 |
| <b>A+/AA</b>                                    | M             | NsTsCr                  | 23.07 ± 13.24                    | 38.46 ± 7.94            | 53.85 ± 7.94                 |
| <b>O+/AA</b>                                    | M             | NsTsCs                  | 23.80 ± 3.25                     | 21.42 ± 5.61            | 28.57 ± 7.38                 |
| <b>A+/AS</b>                                    | M             | NsTsCr                  | 26.67 ± 8.27                     | 35.53 ± 6.49            | 53.33 ± 5.96                 |
| <b>O+/AA</b>                                    | M             | NsTsCs                  | 36.65 ± 2.82                     | 17.79 ± 10.54           | 18.43 ± 5.31                 |
| <b>O+/AA</b>                                    | M             | NsTsCr                  | 35.57 ± 1.50                     | 28.07 ± 3.51            | 56.14 ± 13.54                |
| <b>B+/AA</b>                                    | M             | NsTsCr                  | 41.03 ± 4.13                     | 32.5 ± 3.09             | 67.5 ± 18.43                 |
| <b>B+/AS</b>                                    | F             | NsTsCr                  | 46.15 ± 2.16                     | 42.31 ± 15,75           | 61.54 ± 10.14                |
| <b>O+/AA</b>                                    | M             | NsTsCr                  | 41.03 ± 5.05                     | 14.80 ± 6.39            | 59.59 ± 10.87                |
| <b>A+/AC</b>                                    | M             | NsTsCs                  | 28.57 ± 2.83                     | 38.09 ± 12.13           | 16.67 ± 2.56                 |
| <b>A+/AA</b>                                    | M             | NsTsCr                  | 35.18 ± 11.04                    | 35.12 ± 12.59           | 70.37 ± 13.18                |
| <b>O+/AA</b>                                    | F             | NsTrCs                  | 42.10 ± 4.24                     | 92.10 ± 4.08            | 23.39 ± 3.51                 |
| <b>O+/AC</b>                                    | M             | NsTsCs                  | 29.30 ± 4.96                     | 49.82 ± 11.23           | 14.65 ± 4.34                 |
| <b>O+/AA</b>                                    | M             | NsTsCs                  | 25.05 ± 11.88                    | 24.46 ± 4.59            | 28.59 ± 8.27                 |

**Table S8: W2mef**

| % invasion relative to untreated control |        |                  |                           |                  |                       |
|------------------------------------------|--------|------------------|---------------------------|------------------|-----------------------|
| Donor Erythrocyte                        | Gender | Invasion profile | Neuraminidase (250 mU/ml) | Trypsin (1mg/ml) | Chymotrypsin (1mg/ml) |
| O+/AA                                    | F      | NsTsCr           | 29.14 ± 3.37              | 36.05 ± 11.15    | 58.02 ± 14.32         |
| B+/AA                                    | M      | NsTsCr           | 28.36 ± 6.49              | 34.14 ± 9.6      | 73.41 ± 10.43         |
| B+AS                                     | M      | NsTsCs           | 30.16 ± 5.17              | 37.67 ± 8.84     | 49.53 ± 12.87         |
| O+AS                                     | M      | NsTsCs           | 28.89 ± 3.61              | 38.52 ± 0        | 48.15 ± 3.1           |
| O+AA                                     | M      | NsTsCs           | 29.63 ± 3.13              | 25.92 ± 3.89     | 44.44 ± 2.88          |
| A+/AA                                    | F      | NsTrCr           | 35.71 ± 8.21              | 50.32 ± 3,69     | 64.28 ± 13.29         |
| O-/AA                                    | M      | NsTrCr           | 30.77 ± 9.54              | 62.82 ± 14.15    | 53.85 ± 4.42          |
| A+/AA                                    | M      | NsTrCr           | 22.72 ± 4.06              | 54.54 ± 0.78     | 63.64 ± 17.84         |
| O+/AA                                    | M      | NsTsCr           | 23.67 ± 6.49              | 45.45 ± 7,33     | 51.14 ± 10.58         |
| A+/AS                                    | M      | NsTrCr           | 37.87 ± 3.91              | 60.61 ± 11.37    | 65.75 ± 22.12         |
| O+/AA                                    | M      | NsTsCs           | 27.08 ± 13.13             | 22.32 ± 12.01    | 18.75 ± 17.40         |
| O+/AA                                    | M      | NsTsCr           | 37.44 ± 10.42             | 27.78 ± 2.14     | 55.56 ± 17.46         |
| B+/AA                                    | M      | NsTsCr           | 48.82 ± 7.63              | 44.44 ± 7.63     | 73.73 ± 18.10         |
| B+/AS                                    | F      | NsTsCs           | 40.79 ± 14.31             | 32.46 ± 2.72     | 35.05 ± 16.70         |
| O+/AA                                    | M      | NsTsCs           | 31.25 ± 17.39             | 37.5 ± 14.82     | 41.44 ± 15.00         |
| A+/AC                                    | M      | NsTsCs           | 29.83 ± 11.68             | 48.72 ± 8.18     | 26.76 ± 4.03          |
| A+/AA                                    | M      | NsTsCs           | 30.08 ± 9.89              | 44.84 ± 3.37     | 26.89 ± 3.55          |
| O+/AA                                    | F      | NsTrCs           | 46.38 ± 3.56              | 92.44 ± 7.85     | 37.61 ± 4.31          |
| O+/AC                                    | M      | NsTrCs           | 28.07 ± 4.01              | 63.64 ± 8.73     | 21.832 ± 5.38         |
| O+/AA                                    | M      | NsTsCs           | 21.33 ± 0.49              | 41.33 ± 8.39     | 30.11 ± 4.87          |

**Key:** N: neuraminidase, T: trypsin, C: chymotrypsin, s: sensitive, r: resistant Data represent mean values ± the standard deviation from two independent experiments conducted in triplicates. A cut-off of 50% was taken as a threshold to classify the observed profile as sensitive (≤50%) or resistance (>50%) for each given treatment.

**Table S9:** Summary outputs from multilinear regression analysis. The data were computed using least square regression method to predict the variation of the invasion rate relative to the independent variables.

**Neuraminidase treatment:**  $R^2 = 0.21$ , Adjusted  $R^2 = -0.24$ ,  $F(7, 12) = 0.46$ ,  $P$  value = 0.84

| Variable      | Estimate ( $\beta$ ) | Standard error | 95% confidence interval | t       | P value |
|---------------|----------------------|----------------|-------------------------|---------|---------|
| Invasion rate | 85.99                | 37.09          | 5.176 - 166.8           | 2.318   | 0.0389  |
| Blood group   | 0.2004               | 3.391          | -7.187 - 7.588          | 0.05910 | 0.9538  |
| Hb Genotype   | 1.704                | 6.793          | -13.10 - 16.50          | 0.2508  | 0.8062  |
| GYPAB         | 0.002168             | 0.001754       | -0.001653 - 0.005990    | 1.236   | 0.2400  |
| GYPA          | -0.006624            | 0.01084        | -0.03024 - 0.01699      | 0.6112  | 0.5525  |
| GYPC          | 0.0007943            | 0.01178        | -0.02488 - 0.02647      | 0.06741 | 0.9474  |
| CR1           | -0.006623            | 0.01670        | -0.04300 - 0.02976      | 0.3966  | 0.6986  |
| DAF           | -0.05103             | 0.04862        | -0.1570 - 0.05490       | 1.050   | 0.3146  |

**Trypsin treatment:**  $R^2 = 0.53$ , Adjusted  $R^2 = 0.25$ ,  $F(7, 12) = 1.93$ ,  $P$  value = 0.15

| Variable      | Estimate  | SE       | 95% confidence interval | t       | P value |
|---------------|-----------|----------|-------------------------|---------|---------|
| Invasion rate | 40.01     | 31.31    | -28.20 - 108.2          | 1.278   | 0.2254  |
| Blood group   | 0.2279    | 2.862    | -6.007 - 6.463          | 0.07965 | 0.9378  |
| Hb Genotype   | -0.2142   | 5.733    | -12.71 - 12.28          | 0.03737 | 0.9708  |
| GYPAB         | 0.0007473 | 0.001480 | -0.002478 - 0.003973    | 0.5048  | 0.6228  |
| GYPA          | 0.002327  | 0.009148 | -0.01761 - 0.02226      | 0.2544  | 0.8035  |
| GYPC          | 0.001903  | 0.009945 | -0.01977 - 0.02357      | 0.1913  | 0.8515  |
| CR1           | -0.01686  | 0.01409  | -0.04757 - 0.01385      | 1.196   | 0.2546  |
| DAF           | -0.01154  | 0.04103  | -0.1009 - 0.07786       | 0.2813  | 0.7833  |

**Chymotrypsin treatment:**  $R^2 = 0.21$ , Adjusted  $R^2 = -0.24$ ,  $F(7, 12) = 0.46$ ,  $P$  value = 0.84

| Variable      | Estimate  | SE       | 95% confidence interval | t      | P value |
|---------------|-----------|----------|-------------------------|--------|---------|
| Invasion rate | 70.73     | 25.62    | 14.91 - 126.6           | 2.761  | 0.0173  |
| Blood group   | 5.976     | 2.342    | 0.8732 - 11.08          | 2.552  | 0.0254  |
| Hb Genotype   | 7.311     | 4.692    | -2.912 - 17.53          | 1.558  | 0.1452  |
| GYPAB         | 0.0008028 | 0.001211 | -0.001837 - 0.003442    | 0.6627 | 0.5201  |
| GYPA          | -0.01026  | 0.007487 | -0.02657 - 0.006056     | 1.370  | 0.1958  |
| GYPC          | -0.003504 | 0.008139 | -0.02124 - 0.01423      | 0.4306 | 0.6744  |
| CR1           | 0.009594  | 0.01153  | -0.01554 - 0.03472      | 0.8318 | 0.4217  |
| DAF           | -0.08046  | 0.03358  | -0.1536 - -0.007294     | 2.396  | 0.0338  |
